# ***CUX2* mutations in temporal lobe epilepsy; increased kainate susceptibility and excitatory input to hippocampus in deficient mice**

Toshimitsu Suzuki<sup>1,2†</sup>, Tetsuya Tatsukawa<sup>2†</sup>, Genki Sudo<sup>2†</sup>, Caroline Delandre<sup>3,18</sup>, Yun Jin Pai<sup>3</sup>, Hiroyuki Miyamoto<sup>2</sup>, Matthieu Raveau<sup>2</sup>, Atsushi Shimohata<sup>2,19</sup>, Iori Ohmori<sup>4</sup>, Shin-ichiro Hamano<sup>5</sup>, Kazuhiro Haginoya<sup>6</sup>, Mitsugu Uematsu<sup>7</sup>, Yukitoshi Takahashi<sup>8,9</sup>, Masafumi Morimoto<sup>10</sup>, Shinji Fujimoto<sup>11,12</sup>, Hitoshi Osaka<sup>13</sup>, Hirokazu Oguni<sup>14</sup>, Makiko Osawa<sup>14</sup>, Atsushi Ishii<sup>15</sup>, Shinichi Hirose<sup>15</sup>, Sunao Kaneko<sup>16,17</sup>, Yushi Inoue<sup>9</sup>, Adrian Walton Moore<sup>3</sup>, & Kazuhiro Yamakawa<sup>1,2\*</sup>

<sup>1</sup>Department of Neurodevelopmental Disorder Genetics, Institute of Brain Science, Nagoya City University Graduate School of Medical Science, Aichi, Japan.

<sup>2</sup>Laboratory for Neurogenetics, RIKEN Center for Brain Science, Saitama, Japan.

<sup>3</sup>Laboratory for Genetic Control of Neuronal Architecture, RIKEN Center for Brain Science, Saitama, Japan.

<sup>4</sup>Department of Special Needs Education, Okayama University Graduate School of Education, Okayama, Japan.

<sup>5</sup>Division of Neurology, Saitama Children's Medical Center, Saitama, Japan.

<sup>6</sup>Department of Pediatric Neurology, Miyagi Children's Hospital, Sendai, Japan.

<sup>7</sup>Department of Pediatrics, Tohoku University School of Medicine, Sendai, Japan.

<sup>8</sup>Department of Pediatrics, Gifu Prefectural Gifu Hospital, Gifu, Japan.

<sup>9</sup>National Epilepsy Center, NHO Shizuoka Institute of Epilepsy and Neurological Disorder, Shizuoka, Japan.

<sup>10</sup>Department of Pediatrics, Kyoto Prefectural University of Medicine, Kyoto, Japan.

<sup>11</sup>Department of Pediatrics, Neonatology and Congenital Disorders, Nagoya City University Graduate School of Medical Sciences, Nagoya, Japan.

<sup>12</sup>Tsutsujigaoka Children's Clinic, Aichi, Japan.

<sup>13</sup>Department of Pediatrics, Jichi Medical University, Shimotsuke, Japan.

<sup>14</sup>Department of Pediatrics, Tokyo Women's Medical University, Tokyo, Japan.

<sup>15</sup>Department of Pediatrics, School of Medicine and Research Institute for the Molecular Pathomechanisms of Epilepsy, Fukuoka University, Fukuoka, Japan.

<sup>16</sup>Department of Neuropsychiatry, Hirosaki University School of Medicine, Hirosaki, Japan.

<sup>17</sup>North Tohoku Epilepsy Center, Minato Hospital, Hachinohe, Japan.

<sup>18</sup>Present address: Menzies Institute for Medical Research, University of Tasmania, Tasmania, Australia.

<sup>19</sup>Present address: Department of Physiology, Nippon Medical School, Tokyo, Japan.

†These authors contributed equally to this work.

\* Address correspondence to: Kazuhiro Yamakawa, Ph.D.,

Department of Neurodevelopmental Disorder Genetics, Institute of Brain Science, Nagoya City University Graduate School of Medical Science,

1 Kawasumi, Mizuho-cho, Mizuho-ku Nagoya, Aichi 467-8601, Japan

Tel: +81-52-851-5612, Email: [yamakawa@med.nagoya-cu.ac.jp](mailto:yamakawa@med.nagoya-cu.ac.jp)

ORCID iD: <https://orcid.org/0000-0002-1478-4390>

**Keywords:** *CUX2*, *CUX1*, *CASP*, temporal lobe epilepsy, seizure, kainate

**ORCID number:** Toshimitsu Suzuki: <https://orcid.org/0000-0003-0585-5692>

Tetsuya Tatsukawa: <https://orcid.org/0000-0001-8533-4576>

Iori Ohmori: <https://orcid.org/0000-0001-6823-2762>

Yukitoshi Takahashi: <https://orcid.org/0000-0002-1922-8967>

Shinichi Hirose: <https://orcid.org/0000-0001-6796-3790>

Adrian Walton Moore: <https://orcid.org/0000-0002-8242-301X>

Kazuhiro Yamakawa: <https://orcid.org/0000-0002-1478-4390>

## Abstract

*CUX2* gene encodes a transcription factor that controls neuronal proliferation, dendrite branching and synapse formation, locating at the epilepsy-associated chromosomal region 12q24 that we previously identified by a genome-wide association study (GWAS) in Japanese population. A *CUX2* recurrent *de novo* variant p.E590K has been described in patients with rare epileptic encephalopathies and the gene is a candidate for the locus, however the mutation may not be enough to generate the genome-wide significance in the GWAS and whether *CUX2* variants appear in other types of epilepsies and physiopathological mechanisms are remained to be investigated. Here in this study, we conducted targeted sequencings of *CUX2*, a paralog *CUX1* and its short isoform *CASP* harboring a unique C-terminus on 271 Japanese patients with a variety of epilepsies, and found that multiple *CUX2* missense variants, other than the p.E590K, and some *CASP* variants including a deletion, predominantly appeared in patients with temporal lobe epilepsy (TLE). Human cell culture and fly dendritic arborization analyses revealed loss-of-function properties for the *CUX2* variants. *Cux2*- and *Casp*-specific knockout mice both showed high susceptibility to kainate, increased excitatory cell number in the entorhinal cortex, and significant enhancement in glutamatergic synaptic transmission to the hippocampus. *CASP* and *CUX2* proteins physiologically bound to each other and co-expressed in excitatory neurons in brain regions including the entorhinal cortex. These results suggest that *CUX2* and *CASP* variants contribute to the TLE pathology through a facilitation of excitatory synaptic transmission from entorhinal cortex to hippocampus.

## Introduction

*Cux2* gene encodes a homeobox transcription factor CUX2 that is predominantly expressed in progenitor cells of the subventricular zone in mouse embryos and pyramidal neurons of the upper neocortical layers (II–IV) in adult mice (Zimmer *et al.*, 2004). CUX2 is also expressed in Reelin-positive neurons distributed throughout the layers II–IV in postnatal day 0 (P0) mice (Cubelos *et al.*, 2008a). CUX2 controls neuronal proliferation, dendrite branching, spine morphology and synapse formation (Cubelos *et al.*, 2008b; Cubelos *et al.*, 2010). We recently reported a genome-wide association study (GWAS) on 1,825 Japanese patients with variable epilepsies which identified an associated region at chromosome 12q24.11 – 12q24.13 harboring 24 transcripts including *CUX2* gene (Suzuki *et al.*, 2021). In the region, *CUX2* is only gene which has been reported to be relevant for epilepsy; a recurrent *de novo* variant (c.1768G>A, p.E590K) has been identified in patients with rare epileptic encephalopathies (EEs) (Chatron *et al.*, 2018; Barington *et al.*, 2018). *CUX2* is therefore one of the most promising candidate genes in this 12q24 epilepsy-associated region, but the mutation reported in rare EEs may not be enough to explain the association detected in the Japanese GWAS study.

To investigate whether *CUX2* and its paralogues' mutations are involved in other types of epilepsies, here we performed targeted sequencing of *CUX2*, its paralog *CUX1*, and *CASP* which is a short isoform of *CUX1* with a unique C-terminus, in Japanese patients with variable epilepsies including idiopathic and symptomatic ones, and identified their variants predominantly in patients with temporal lobe epilepsy (TLE), the most common but intractable form of epilepsy (Télez-Zenteno *et al.*, 2012). Analyses in human cultured cell and transgenic fly showed that the variants have loss-of-function effects. *CUX2* and *CASP* deficiencies in mice increased their seizure susceptibilities to a convulsant, kainate, which has long been used to

generate TLE animal models (Lévesque *et al.*, 2013). Histological and electrophysiological analyses revealed increases of excitatory neuron numbers in entorhinal cortex and those in excitatory input to hippocampus in both mice, proposing a circuit mechanism for the pathology of TLE.

## Materials and Methods

### Subjects

Genomic DNAs from 271 Japanese patients with a variety of epilepsies (see Results section for contents) and 311 healthy Japanese volunteers recruited by cooperating hospitals were used for the targeted sequencing analyses for *CUX2*, *CUX1* and *CASP*. In addition, DNAs from independent 69 Japanese patients with TLE were used to check the frequency of c.3847G>A (p.E1283K) variant in *CUX2* gene. The patients' DNAs analyzed in our GWAS (Suzuki *et al.*, 2021) were not used in the present study, because their epilepsy subtype information [TLE, etc.] were not available for those materials.

### Targeted sequencing

Genomic DNA samples were amplified with the illustra GenomiPhi V2 DNA Amplification Kit (GE Healthcare). We designed PCR primers to amplify all coding regions of *CUX2* (NM\_015267), *CUX1* (NM\_001202543 and first exon of NM\_181552), unique C-terminus region of *CASP* (NM\_001913), and amplified genomic DNA by PCR using the PrimeSTAR HS DNA Polymerase (TaKaRa) or KOD-plus Ver. 2 (TOYOBO). The PCR products were purified using ExoSAP-IT PCR product Cleanup (Thermo Fisher Scientific) and analyzed by direct sequencing using the ABI PRISM 3730xl Genetic Analyzer. All novel variants identified in amplified DNA by GenomiPhi were verified by direct-sequencing of patients' genomic DNAs. Primer sequences and PCR conditions are available upon request.

**Quantification of mRNA** – described in the Supplemental Methods.

### Domain search

Domain searches in CUX2, CUX1, and CASP amino acid sequences were performed using the SMART database.

**Expression constructs and mutagenesis** – described in the Supplemental Methods.

**Cell imaging** – described in the Supplemental Methods.

**Drosophila stocks and crosses** – described in the Supplemental Methods.

**TUNEL assay in flies** – described in the Supplemental Methods.

## **Mice**

*Cux2* knockout (KO) mouse was obtained from Texas A&M Institute for Genomic Medicine (TIGM) as cryopreserved sperm of heterozygous *Cux2* gene trap mouse (129/SvEv × C57BL/6 background) derived from the gene trapped clone OST440231. Live animals were produced by *in vitro* fertilization at the Research Resources Division (RRD) of the RIKEN Center for Brain Science. The heterozygous mice were maintained on the C57BL/6J (B6J) background, and the resultant heterozygous mice were interbred to obtain wild-type (WT), heterozygous, and homozygous mice. Genotyping was carried out as described previously (Iulianella *et al.*, 2008). *Casp*-specific KO mice were generated using the CRISPR/Cas system. Plasmid vector pX330-U6-Chimeric\_BB-CBh-hSpCas9 was a gift from Dr. Feng Zhang (Addgene plasmid # 42230). A pair of oligo DNAs corresponding to *Casp*-gRNA (TTTCCATCATCTCCAGCCAA AGG) in exon 17 of *Casp* (NM\_198602) was annealed and ligated into pX330-U6-Chimeric\_BB-CBh-hSpCas9. For knock-out mouse production, Cas9 mRNAs and *Casp*-gRNA were diluted to 10 ng/μL each. Further, B6J female mice and ICR mouse strains were used as embryo donors and foster mothers, respectively. Genomic DNA from founder mice was extracted, and PCR was performed using gene-specific primers (CRISPR\_check\_F: 5'-GGAGCTATTGTAGGACATCACAGA-3' and CRISPR\_check\_R: 5'-



CCCCAGTGTTCTTTACTTTGAGTT-3'). PCR products were purified using ExoSAP-IT PCR product Cleanup and analyzed by direct sequencing using the ABI PRISM 3730xl Genetic Analyzer. The heterozygous mutant mice (c.1514<sup>^</sup>1515ins.TT, p.S506fs) were crossbred with B6J mice, and the resultant heterozygous mice were interbred to obtain WT, heterozygous, and homozygous mutant mice. The frame-shift mutation was confirmed by sequence analysis of cDNA from mutant mouse brains.

**Seizure susceptibility in mice** – described in the Supplemental Methods.

### **CUX2 antibody generation**

To generate a rabbit polyclonal antibody to CUX2, a fusion protein was prepared, in which the glutathione-S-transferase (GST) protein was fused to the a.a. residues 356 to 415 of mouse CUX2 which has been used in the previous study's antibody generation (Gingras *et al.*, 2005). Rabbits were injected with 0.5 mg of purified GST fusion protein in Freund's complete adjuvant, boosted five times with 0.25 mg of protein, and serum collection at 1 week following the last boost. Polyclonal antibody was purified by affinity chromatography. The serum was passed through a GST affinity column ten times, and the flow-through was then applied to a GST-CUX2 (356-415 a.a.) affinity column to isolate antibodies.

**Histological analyses** – described in the Supplemental Methods.

**In vitro electrophysiology** – described in the Supplemental Methods.

**Co-immunoprecipitation** – described in the Supplemental Methods.

### **Statistical analysis**

In the *in vitro* and *in vivo* experiments, data are presented as Box-and-whisker plots or means  $\pm$  s.e.m. The boxes show median, 25th and 75th percentiles, and whiskers represent minimum and maximum values. *P*-value for p.E1283K was calculated using the Cochran-Armitage trend test.

One-way or two-way ANOVA, Tukey's multiple comparison test, Chi-square test, or Kolmogorov-Smirnov test were used to assess the data as mentioned in the figure legends. Statistical significance was defined as  $P < 0.05$ .

### **Study approval**

Human study: All subjects and control individuals provided written informed consent to participate in this study in accordance with approval by ethical committees at the RIKEN Centers for Brain Science.

Animal study: All experimental protocols were approved by the Animal Experiment Committee of the RIKEN Center for Brain Science.

# Results

## ***CUX2* variants predominantly appeared in Japanese TLE patients**

We carried out a targeted sequencing of *CUX2* in 271 Japanese patients with variable epilepsies consisting of 116 idiopathic and 155 symptomatic ones. Symptomatic epilepsy samples contained 68 TLEs, which were further divided to 57 mesial TLE (mTLE) and 11 lateral TLE (lTLE). We identified five *CUX2* heterozygous missense variants in nine unrelated patients (Figure 1A, Table 1 and Supplemental Note). Notably, eight of the nine patients with *CUX2* variants had TLE (one lTLE and seven mTLE patients). All of the mTLE patients showed hippocampal sclerosis. Three (p.R34W, p.P454L, and p.W958R) out of the five variants were absent or rare ( $< 0.5\%$ ) in the in-house Japanese control individuals (in-house controls) and databases and were also predicted to be damaging (Table 1). The p.E1283K variant, a frequent variant predicted to be less damaging, appeared in Japanese TLE patients at a significantly high ratio [ $P = 5.93 \times 10^{-3}$ , OR = 6.94, 95% CI = 1.39–34.61 calculated in 137 (above-mentioned 68 + additional independent 69) TLE patients vs 311 in-house controls] and therefore we hypothesized it may also be a genetic contributor for TLE. The p.D337N variant appeared in one case with TLE and controls with a similar allele frequency.

## **Loss-of-function effects of *CUX2* variants**

To investigate the functional impacts of *CUX2* variants appeared in patients with epilepsy (Figure 1A, Table 1), we transfected HeLa.S3 cells with expression constructs of wild-type (WT) and the five variants (p.R34W, p.D337N, p.P454L, p.W958R, and p.E1283K). It revealed that, while *CUX2*-WT protein was limited to and well distributed in the nuclei, variant proteins (except for p.R34W) leaked out to the cytoplasm or aggregated (Figure 1B, C and Figure S1A).

*CUX2* is an ortholog of *Drosophila melanogaster cut*, which promotes dendritic arbor morphological complexity (Jinushi-Nakao *et al.*, 2007). We generated transgenic fly lines to express human WT *CUX2* or variants (p.R34W, p.D337N, p.P454L, p.W958R, and p.E1283K) and analyzed their dendritic arbor morphology in *Drosophila* larvae (Figure 1D-G and Figure S1B-D). Similar to its *Drosophila* orthologue (Jinushi-Nakao *et al.*, 2007), ectopic expression of *CUX2* WT strongly increased dendritic arbor complexity (branch number and length). However, activities to drive arbor complexity in the variants were significantly decreased, except for p.R34W and p.D337N. RT-qPCR assays in the adult transgenic flies revealed that expression levels of the *CUX2* variants, p.P454L and p.W958R, were significantly lower (Figure 1H). All *CUX2* constructs were inserted into the same genomic site; therefore, the lower expression levels of transgenes are not likely to be due to position effects but most likely due to variant-dependent degradation. TUNEL of adult fly brains showed that the alleles did not promote apoptotic cell death (Figure S1E). Together, these observations suggest that the *CUX2* variants present in patients with epilepsy cause loss-of-function of the protein.

### ***Cux2*-deficient mice show increased susceptibility to kainate**

Because of the loss-of-function nature of epilepsy-associated *CUX2* variants, we next investigated *Cux2*-KO mice (Iulianella *et al.*, 2008). The body weight of 2-month-old mice was comparable among genotypes (Figure S2A). In electrocorticogram analysis, the median of the poly spike and wave discharges frequency was slightly higher in the primary somatosensory cortex forelimb region of *Cux2*(-/-) than WT mice, however the difference did not reach statistical significance (data not shown). No obvious epileptic behaviors or changes in local field potential recordings in the hippocampus were noted in *Cux2*(+/-) or *Cux2*(-/-) mice. Although

patients with TLE often have past histories of febrile seizures (Maher *et al.*, 1995), *Cux2*-KO mice did not show any seizure susceptibility to increased body temperature (data not shown). Seizure susceptibility to pentylenetetrazole (PTZ), a GABA-A receptor antagonist, remained unchanged in *Cux2*-KO mice (Figure S2B-F). Importantly, however, *Cux2*-KO mice had a high susceptibility to kainate, which is commonly used to generate TLE animal models (Lévesque *et al.*, 2013), in frequencies of generalized convulsive seizures (GS) (Figure 2A) and lethality (Figure 2B). The latencies to onset of GS and death were also significantly decreased in *Cux2*(-/-) mice (Figure S2G, H). Seizure severity was also significantly higher in *Cux2*-KO female mice (Figure 2C). These results support the notion that *CUX2* loss-of-function mutations cause TLE.

### ***Cux2*-deficient mice show increased cell number in entorhinal cortex and glutamatergic input to hippocampus**

*Cux2*(-/-) mice have been reported to show overgrowth of the neocortical upper layers (Cubelos *et al.*, 2008b). In a Nissl staining, we also found a significantly increased cell number in entorhinal cortex layers II-III, which projects to hippocampal dentate granule cells and CA3 pyramidal cells (Figure 2D). In the slice-patch recordings, we further found that perforant path-evoked excitatory postsynaptic currents (eEPSCs) in the dentate granule cells were significantly higher in *Cux2*(-/-) mice (Figure 2E), indicating that glutamatergic synaptic transmission from the entorhinal cortex layers II–III onto the hippocampus was significantly facilitated in *Cux2*-KO mice.

At a glance, hippocampal structures in *Cux2*-KO mice were comparable to 2- and 10-month-old WT mice (Figure 2D, Figure S3). We generated an anti-CUX2 antibody similarly to a previous study (Gingras *et al.*, 2005) and confirmed the presence of CUX2 immunosignals in

WT and absence in *Cux2*(-/-) mice (Figure S3A, B). CUX2 immunosignals were dense in the neocortical upper layers (II-IV) as previously reported (Zimmer *et al.*, 2004) and also dense in the entorhinal cortex upper layers (II-III) (Figure S3C). In WT hippocampus, we only observed CUX2 immunolabeling signals in inhibitory interneurons, specifically somatostatin (SST)-positive, reelin (RLN)-positive and parvalbumin (PV)-positive inhibitory, but not in excitatory neurons (Table S1, Figure S4). We found that there were no significant differences in interneuron cell numbers between genotypes (Figure S5A-D). Timm staining and immunohistochemistry for c-Fos (Figure S5E, F), Doublecortin, phospho-Histone H3, Ki67, NeuN, GFAP, and ZnT-3 (data not shown) did not show differences in the hippocampus between genotypes. There are five subtypes of kainate receptors (KARs), GLUK1–GLUK5, in primates and rodents. We investigated KARs expression in the hippocampus of 2-month-old *Cux2*-KO female mice. RT-qPCR assays revealed that the expression of *GluK1* (formerly named *GluR5*) was significantly higher in *Cux2*(-/-) mice (Figure 2F), which is presumably a homeostatic compensatory reaction to epileptic seizures (see Discussion). The baseline frequencies of spontaneous inhibitory postsynaptic currents (sIPSCs) in hippocampal dentate granule cells were significantly higher at 6–7 weeks old, and this difference was suppressed after bath-application of GYKI and AP5, which are AMPA and NMDA receptor antagonists, respectively (Figure 2G). Frequency of sIPSC in dentate PV-positive interneurons was also increased in *Cux2*-KO mice (Figure S6). These results suggest that, in *Cux2*(-/-) mice, the function of hippocampal inhibitory neurons remained intact, but the increased excitatory input from the entorhinal cortex to the hippocampus could facilitate firing activities of inhibitory neurons, which itself would also be a compensatory action to epileptic activities in mice. In CA3 pyramidal neurons of *Cux2*-KO mice, EPSCs were not significantly affected (Figure S6), suggesting that the increased excitatory input

in the upstream dentate granule cells may be neutralized by the increased inhibitory input in those cells.

Taken together, these results suggest that the increase in entorhinal cortex layers II–III cell numbers and the resultant facilitation of glutamatergic synaptic transmission from the entorhinal cortex layers II–III onto hippocampi are causal factors leading to the increased susceptibility to kainate of *Cux2*-KO mice. Increases in GLUK1 and facilitated firing of inhibitory neurons in the mouse hippocampus would rather be compensatory reactions.

### ***CASP* variants in TLE patients**

*CUX1* is a paralog of *CUX2*, and *CASP* is an alternatively spliced short isoform of *CUX1* harboring a unique C-terminus (Lievens *et al.*, 1997) (Figure 3A, Figure S7). *CUX1* and *CUX2* proteins have four DNA binding domains (three CUT repeats and one homeodomain), but *CASP* lacks all of these domains and instead contains a transmembrane domain. We performed targeted sequencing analyses of *CUX1* and *CASP* in the 271 Japanese patients with epilepsy and identified nine nonsynonymous variants (Figure 3A, Table 1, and Supplemental Note). Among those, one variant in *CUX1*, c.4172C>T (p.T1391I) and three variants in *CASP*, c.1433C>T (p.A478V), c.1524delG (p.R509fs), and c.1868\_1870delTCT (p.F623del), were completely absent or very rare in in-house controls and databases (Table 1). No other truncation variants of the *CASP*-specific sequence were found in these databases, suggesting that *CUX1* and especially *CASP* variants contribute to epilepsy. Although epilepsies observed in patients with *CUX1* and *CASP* variants were rather heterogeneous, *CASP*-p.G563S and p.F623del variants appeared in mTLE and lTLE patients, respectively (Table 1). The mTLE patient SIZ-060 showed hippocampal sclerosis (Supplemental Note).

## **CASP and CUX2 proteins are co-expressed in excitatory neurons of entorhinal cortex upper layer and physiologically bind to each other**

Immunohistochemistry with CUX1 antibodies in 2-month-old WT mice revealed CUX1 immunosignals in excitatory neurons at the neocortical upper layers (II-IV), as previously reported (Cubelos *et al.*, 2008b), and those at the entorhinal cortex upper layers (II-III) (Figure 3B), similar to CUX2 (Figure S3C). In contrast in the hippocampus, CUX1 was expressed in SST-positive, RLN-positive, and PV-positive interneurons, but not in excitatory neurons (Figure 3B and Figure S8), similar to CUX2 (Figure S4). Using a CASP-specific antibody recognizing 400–650 a.a., we found that CASP was rather widely expressed in neurons of multiple brain regions, but still dense in the neocortical and entorhinal cortex upper layers, similar to CUX1 and CUX2 (Figure 3C). In the hippocampus, CASP was dense in hilar and stratum-oriens SST-positive cells that expressed CUX2 (Figure 3C, D), and more specifically, within the cytoplasm (Figure S9), which is consistent with CASP expression in the Golgi apparatus (Gillingham *et al.*, 2002).

A protein interaction between CUX1 and CASP has been previously reported (Lievens *et al.*, 1997). Here we newly found that the CASP protein physically interacts with CUX2 (Figure S10). All three tested CUX2 rare variants bound to CASP, and all three tested CASP rare variants bound to CUX2 (Figure S10), suggesting that the variants did not affect protein binding between CASP and CUX2.

## **Casp-deficient mice also show increased cell number in entorhinal cortex and glutamatergic input to hippocampus**



It has been reported that the number of cortical neurons was significantly increased in *Cux1*(-/-); *Cux2*(-/-) double-mutant mice, but this increase was no greater than that in the *Cux2*(-/-) single mutant; therefore, regulation of the upper layer neuronal number was assumed to be a unique function of CUX2 and not redundant with CUX1 activities (Cubelos *et al.*, 2008b). Because of the low survivability of *Cux1*-KO mice (Luong *et al.*, 2002) and our observation that the TLE variants appeared in the *CASP*-unique sequence but not in *CUX1* itself, we decided to investigate *Casp*-specific KO rather than *Cux1*-KO mice for analysis. We generated a *Casp*-specific KO mouse by targeting exon 17 at the unique C-terminus (Figure S7C). *Casp*(+/-) and *Casp*(-/-) mutant mice were born at a Mendelian ratio, grew normally, and were fertile. RT-qPCR analyses revealed that the *Casp* mRNA became half and diminished in *Casp*(+/-) and *Casp*(-/-) mice, respectively, whereas *Cux1* and *Cux2* mRNA levels remained unchanged (Figure 3E). CASP immunosignals well disappeared in *Casp*(-/-) mice (Figure S9A), confirming the specificity of the CASP antibody. At a glance, there were no abnormal localizations and intensities of CUX1 and CUX2 proteins in *Casp*-KO mice (Figure S9B, C). The median body weight was comparable among genotypes at 2 months of age (Figure S9D). RT-qPCR assays of KARs mRNA in the hippocampi of 2-month-old *Casp*-KO mice did not show significant change in KARs expression levels (Figure S9E).

In a Nissl staining of 2-month-old *Casp*-KO mice, no increase of neuron number was observed in the entorhinal cortex (Figure S9F). However, immunohistochemical staining using the anti-CUX1 antibody as a marker of neurons at upper layers of the neocortical (II–IV) and the entorhinal cortex (II–III) showed a tendency of increase in both the neocortex and entorhinal cortex ( $P = 7.57 \times 10^{-2}$  and  $P = 4.50 \times 10^{-1}$ , respectively) (Figure 3F). Furthermore, *Casp*-KO mice also showed high susceptibility to kainate (Figure 3G, H, Figure S9G–I). After

intraperitoneal application of kainate, a larger number of *Casp*-KO mice showed GS and lethality (Figure 3G, H). Onset latencies of GS and death were significantly decreased in *Casp*-KO mice (Figure S9H, I). Seizure severity in *Casp*(-/-) mice was also significantly higher (Figure S9G). Kainate susceptibility was higher in male *Casp*-KO mice, contrary to *Cux2*-KO mice in which the susceptibility is higher in female. Notably again, perforant path-evoked EPSCs (eEPSCs) in the dentate granule cells were significantly higher in *Casp*-KO mice (Figure 3I), which is similar to *Cux2*-KO mice (Figure 2E).

All of these observations propose that facilitation of glutamatergic synaptic transmission from the entorhinal cortex onto hippocampal dentate granule cells is a common mechanism for TLE caused by *CUX2* and *CASP* variants.

# Discussion

In this study, we performed targeted sequencing analyses of *CUX2*, *CUX1* and *CASP* on 271 Japanese patients with a variety of epilepsies, and found that *CUX2* missense variants predominantly appear in TLE patients, in that eight of 68 TLE patients (12%) had *CUX2* variants. Most of the *CUX2* variants showed functional impairments. *CASP* variants also appeared in two TLE patients. Most of these patients showed hippocampal sclerosis, suggesting that *CUX* family variants may contribute to TLE, especially drug-resistant mesial TLE. Our recent GWAS analysis of Japanese patients with variable epilepsies identified a region with genome-wide significance at chromosome 12q24 which harbors *CUX2* (Suzuki *et al.*, 2021). Although a recurrent *de novo* *CUX2* variant p.E590K has been described in patients with EEs (Chatron *et al.*, 2018; Barington *et al.*, 2018), a previous whole exome sequencing study for Japanese patients with EEs (Takata *et al.*, 2019) did not find the *CUX2* pathogenic variant, and therefore the *CUX2* recurrent variant in EEs may not be enough to explain the genome-wide association with epilepsy at the 12q24 region in Japanese population. In our GWAS study (Suzuki *et al.*, 2021), sub-analyses for subtypes of epilepsies further revealed that a polymorphic marker at the 12q24 epilepsy-associated region showed genome-wide significant association with symptomatic epilepsy. TLE is the major entity for symptomatic epilepsy, and therefore the *CUX2* variants in patients with TLE would contribute to the association with epilepsy at 12q24 in Japanese population.

Human cell culture and fly dendritic arborization analyses revealed loss-of-function properties of the *CUX2* variants appeared in TLE patients. *CASP* also showed variants in epilepsy patients including TLE at the unique C-terminus and we further found that the *CASP* physically binds to *CUX2*. Although all tested *CASP* variants did not affect the binding activity

to CUX2, the CASP protein has been reported to play a role in intra-Golgi retrograde transport (Malsam *et al.*, 2005) and therefore the variants in CASP may still affect the subcellular transport or protein modification of CUX2.

*Cux2*- and *Casp*-KO mice did not show spontaneous seizures but showed significantly elevated seizure susceptibility to kainate, an agent which has been used to establish TLE animal models (Lévesque *et al.*, 2013). We previously reported a nonsense mutation of the *KCND2* gene encoding a voltage-gated potassium channel Kv4.2 in a patient with TLE (Singh *et al.*, 2006). Similar to *Cux2*- and *Casp*-KO mice, *Kcnd2*-KO mice did not show spontaneous epileptic seizures but showed increased susceptibility to kainate in seizure and mortality (Barnwell *et al.*, 2009). These observations suggest that increased seizure susceptibility to kainate correlates with genetic susceptibility to TLE and that other additional modifying, genetic, or environmental factors influence full expression of TLE phenotypes.

*Cux2*-KO mice showed a significant and *Casp*-KO mice showed a tendency of, increases in entorhinal cortex layer II–III excitatory neuron cell number. Although *Casp*-KO mice did not show any significant changes in *Cux2* mRNA expression levels and histological or cytological distributions of CUX2 protein, co-expression of CASP and CUX2 proteins in neurons including entorhinal cortex projection neurons, and the physiological interaction between CASP and CUX2 proteins still suggest that CASP deficiency may impair CUX2 function through an as-yet unknown mechanism, consequently leading to increased entorhinal cortex excitatory neuron cell number in *Casp*-KO mice. Furthermore, both *Cux2*- and *Casp*-KO mice revealed significant increases in perforant path-evoked EPSCs in dentate granule cells. These results suggest that facilitation of glutamatergic synaptic transmission from the entorhinal cortex onto hippocampal dentate granule cells is a causal basis for the significant increase in seizure susceptibilities to

kainate in *Cux2*- and *Casp*-KO mice. In contrast, the observed changes in the hippocampus of *Cux2*-KO mice are assumed to be homeostatic compensatory reactions to the epileptic causal changes. In the hippocampus of WT mice, CUX2 immunolabelling was only observed in inhibitory interneurons such as SST-positive, RLN-positive, and PV-positive inhibitory, but not in excitatory neurons. In the *Cux2*-KO mice, although no changes were observed in interneuron cell numbers, a significant increase in sIPSC frequency was observed in dentate granule cells similar to patients with TLE (Li *et al.*, 2010), which would presumably be a compensatory reaction to the increased excitatory input from the entorhinal cortex to the hippocampus. The increased GLUK1 expression in the hippocampus of *Cux2*-KO mice may also be suppressive for epileptic seizures because *GluK1* is expressed in inhibitory neurons (Bureau *et al.*, 1999), and GLUK1 expression has been assumed to be protective at least for kainate-induced epilepsy (Fritsch *et al.*, 2014). Taken together, the changes within the hippocampus of *Cux2*-KO mice may be homeostatic compensatory responses rather than causal actions to epileptic seizures, and these changes in the hippocampus themselves also support the occurrence of epileptic causal changes in these mice.

In summary, our results of mutation analyses of *CUX* family genes in patients with epilepsies including TLE and the functional and mouse model analyses suggest that *CUX* family gene deficiency is one of the bases for TLE and that increase of cell number in the entorhinal cortex projection neurons and resultant increase of glutamatergic synaptic transmission to hippocampus is a possible pathological mechanism for TLE.

## **Acknowledgments**

We thank the patients, families, volunteers, Lab for Genetic Control of Neuronal Architecture, Lab for Neurogenetics, Research Resources Division, Center for Brain Science, RIKEN. The authors also thank Dr. A. Miyawaki for the mRFP plasmid. This work was partly supported by grants from the Center for Brain Science and President's Discretionary Fund, RIKEN, and the Japan Agency for Medical Research and Development (AMED) under Grant Number JP20ek0109388.

## **Disclosure of Conflicts of Interests**

None of the authors has any conflict of interest to disclose.

## References

- Barington M, Risom L, Ek J, Uldall P, Ostergaard E. A recurrent de novo CUX2 missense variant associated with intellectual disability, seizures, and autism spectrum disorder. *Eur J Hum Genet* 2018;26:1388–91.
- Barnwell LF, Lugo JN, Lee WL, Willis SE, Gertz SJ, Hrachovy RA. Kv4.2 knockout mice demonstrate increased susceptibility to convulsant stimulation. *Epilepsia* 2009;50:1741–51.
- Bureau I, Bischoff S, Heinemann SF, Mulle C. Kainate receptor-mediated responses in the CA1 field of wild-type and GluR6-deficient mice. *J Neurosci* 1999;19:653–63.
- Chatron N, Møller RS, Champaigne NL, Schneider AL, Kuechler A, Labalme A, et al. The epilepsy phenotypic spectrum associated with a recurrent CUX2 variant. *Ann Neurol* 2018;83:926–34.
- Cubelos B, Sebastián-Serrano A, Kim S, Redondo JM, Walsh C, Nieto M. Cux-1 and Cux-2 control the development of Reelin expressing cortical interneurons. *Dev Neurobiol* 2008a;68:917-25.
- Cubelos B, Sebastián-Serrano A, Kim S, Moreno-Ortiz C, Redondo JM, Walsh CA, et al. Cux-2 controls the proliferation of neuronal intermediate precursors of the cortical subventricular zone. *Cereb Cortex* 2008b;18:1758–70.
- Cubelos B, Sebastián-Serrano A, Beccari L, Calcagnotto ME, Cisneros E, Kim S, et al. Cux1 and Cux2 regulate dendritic branching, spine morphology, and synapses of the upper layer neurons of the cortex. *Neuron* 2010;66:523–35.
- Fritsch B, Reis J, Gasior M, Kaminski RM, Rogawski MA. Role of GluK1 kainate receptors in seizures, epileptic discharges, and epileptogenesis. *J Neurosci* 2014;34:5765–75.
- Gillingham AK, Pfeifer AC, Munro S. CASP, the alternatively spliced product of the gene

- encoding the CCAAT-displacement protein transcription factor, is a Golgi membrane protein related to giantin. *Mol Biol Cell* 2002;13:3761–74.
- Gingras H, Cases O, Krasilnikova M, Bérubé G, Nepveu A. Biochemical characterization of the mammalian Cux2 protein. *Gene* 2005;344:273–85.
- Iulianella A, Sharma M, Durnin M, Vanden Heuvel GB, and Trainor PA Cux2 (Cutl2) integrates neural progenitor development with cell-cycle progression during spinal cord neurogenesis. *Development* 2008;135:729–41.
- Jinushi-Nakao S, Arvind R, Amikura R, Kinameri E, Liu AW, and Moore AW. Knot/Collier and cut control different aspects of dendrite cytoskeleton and synergize to define final arbor shape. *Neuron* 2007;56:963–78.
- Lévesque M, and Avoli M. The kainic acid model of temporal lobe epilepsy. *Neurosci. Biobehav Rev* 2013;37:2887–99.
- Li JM, Zeng YJ, Peng F, Li L, Yang TH, Hong Z, et al.. Aberrant glutamate receptor 5 expression in temporal lobe epilepsy lesions. *Brain Res* 2010;1311:166–74.
- Lievens PM, Tufarelli C, Donady JJ, Staggs A, Neufeld EJ. CASP, a novel, highly conserved alternative-splicing product of the CDP/cut/cux gene, lacks cut-repeat and homeo DNA-binding domains, and interacts with full-length CDP in vitro. *Gene* 1997;197:73–81.
- Luong MX, van der Meijden CM, Xing D, Hesselton R, Monuki ES, Jones SN, et al. Genetic ablation of the CDP/Cux protein C terminus results in hair cycle defects and reduced male fertility. *Mol Cell Biol* 2002;22:1424–37.
- Maher J, and McLachlan RS. Febrile convulsions. Is seizure duration the most important predictor of temporal lobe epilepsy? *Brain* 1995;118:1521–8.
- Malsam J, Satoh A, Pelletier L, Warren G. Golgin tethers define subpopulations of COPI



vesicles. *Science* 2005;307:1095–8.

Singh B, Ogiwara I, Kaneda M, Tokonami N, Mazaki E, Baba K, et al. A Kv4.2 truncation mutation in a patient with temporal lobe epilepsy. *Neurobiol Dis* 2006;24:245–53.

Suzuki T, Koike Y, Ashikawa K, Otomo N, Takahashi A, Aoi T, et al. Genome-wide association study of epilepsy in Japanese population identified an associated region at chromosome 12q24. *Epilepsia* 2021; 62:1391-400.

Takata A, Nakashima M, Saitsu H, Mizuguchi T, Mitsuhashi S, Takahashi Y, et al. Comprehensive analysis of coding variants highlights genetic complexity in developmental and epileptic encephalopathy. *Nat Commun* 2019;10:2506.

Téllez-Zenteno JF, and Hernández-Ronquillo L. A review of the epidemiology of temporal lobe epilepsy. *Epilepsy Res Treat* 2012;630853.

Zimmer C, Tiveron MC, Bodmer R, Cremer H. Dynamics of Cux2 expression suggests that an early pool of SVZ precursors is fated to become upper cortical layer neurons. *Cereb Cortex* 2004;14:1408–20.

## Figure Legends

**Figure 1. Loss-of-function effects of TLE variants in *CUX2*.** (A) *CUX2* protein structure (NP\_056082) with variants appeared in patients with epilepsy. (B) Abnormal subcellular localization of *CUX2* variant proteins. *CUX2*-WT protein (arrows) was limited to, but well distributed within, nuclei stained with DAPI (cyan), whereas variants showed abnormal aggregates in nuclei (W958R) or leaked-out to the cytoplasm (E1283K) (arrowheads). Scale bars = 20  $\mu$ m. (C) Ratio of abnormally localized *CUX2* proteins (> 200 cells counted). n = WT: 545, R34W: 282, D337N: 363, P454L: 239, W958R: 565, and E1283K: 323 cells. (D-H) *CUX2* WT accelerated arborization of fly neurons and TLE variants lowered its activity and expression. Representative images of neurons without *CUX2* (D), WT control (E), and W958R (F). Scale bars = 50  $\mu$ m. (G) Shortened dendrite length in transgenic fly with mutants (n = 11–25 neurons per genotypes) and (H) lowered expression of mutants (n = 6). One-way ANOVA Tukey's multiple comparison test (C, G, H). \*P < 0.05, \*\*P < 0.01, \*\*\*P < 0.001.

**Figure 2. Increased kainate susceptibility, entorhinal cortical cell number, and excitatory input to hippocampal granule cells in *Cux2*-KO mice.** (A-C) Seizure-related events in mice after intraperitoneal injection of kainate (KA). Ratio of animals exhibiting generalized convulsive seizure (GS) (A), mortality rate (B), and seizure severity scores (C) was significantly higher in *Cux2*(-/-) female and combined gender mice. (D) Number of entorhinal cortex layer II-III excitatory neurons was significantly increased in *Cux2*(-/-) mice (2-month-old). Scale bar = 100  $\mu$ m. (E) Slice-patch analyses showed that perforant path-evoked EPSCs in dentate granule cells were significantly increased in *Cux2*(-/-) female. (F) RT-qPCR analyses revealed that *GluK1* mRNA was significantly increased in *Cux2*(-/-) mice. (G) Basal frequency of sIPSC in

dentate granule cells of *Cux2*(-/-) female was significantly increased, and it was suppressed with subsequent applications of antagonists for AMPA receptor (GYKI) and NMDA receptor (AP5). Kainate (KA) increased the sIPSC frequency, which was then suppressed by the GABA-A receptor antagonist picrotoxin. DG; dentate gyrus, Ent; entorhinal area. Yates' correction after Pearson's Chi-square (A, B), one-way ANOVA Tukey's test (C, F, G), one-way ANOVA (D), or two-way ANOVA Tukey's test (E). n: mouse numbers. \*P < 0.05, \*\*P < 0.01, \*\*\*P < 0.001.

**Figure 3. CASP variants in epileptic patients, CASP distribution, and increases in kainate susceptibility and excitatory input to hippocampal granule cells in *Casp*-KO mice.** (A) Locations of *CUX1* and *CASP* variants in patients with epilepsy (see Table 1). Dashed lines define the common region. (B) *CUX1* immunosignals (brown) in neocortical and entorhinal cortex upper layer excitatory neurons and hippocampal interneurons. (C) *CASP* (brown) expressed more widely in neurons, and intensely expressed in neocortical and entorhinal cortex upper layer excitatory neurons. (D) In hippocampus, *CASP* (brown) was dense in SST-positive (blue) interneurons at hilus and stratum oriens (arrows). d2-d5; magnified images outlined in d1. Scale bars = 100  $\mu$ m (B, C and d1), 20  $\mu$ m (d2-d5). so; stratum oriens, sp; stratum pyramidale, sg; stratum granulosum, h; hilus. (E) RT-qPCR analyses revealed that *Casp* mRNA was decreased, while *Cux1* and *Cux2* mRNAs remained unchanged, in *Casp*-KO mice. (F) Thickness of the *CUX1*-positive neocortical layer (left), density of *CUX1*-positive cell in neocortex (middle), and *CUX1*-positive cell density in entorhinal cortex (right). *CUX1*-positive cell density tended increase at neocortex and entorhinal cortex in *Casp*(-/-) mice (2-month-old) but not statistically significant. (G, H) *Casp*-KO mice showed significantly higher susceptibility to kainate in seizure rate (G), mortality (H). (I) Perforant path-evoked EPSCs in dentate granule

cells were significantly increased in *Casp*(-/-) male (6–7-week-old). One-way ANOVA Tukey's test (E), Yates' correction after Pearson's Chi-square (G, H), or two-way ANOVA Tukey's test (I). n: mouse numbers. \*P < 0.05, \*\*P < 0.01, \*\*\*P < 0.001.

## Supplementary Figure Legends

### Figure S1. CUX2 mutants show abnormal subcellular localizations in human. cultured cells

**and decreased branching effects but no apoptosis in fly.** (A) In HeLa.S3 cells, CUX2 mutant proteins (R34W, D337N, and P454L) show aggregates or abnormal leakage-out into cytoplasm (arrowheads) and some WT-like distribution (arrows). Nuclei were stained with DAPI (cyan).

(B-D) Mutations lowered the neurite arborization activity of CUX2 in fly neurons.

Representative images of CUX2-R34W (B) and CUX2-P454L (C). Terminal point numbers were significant decreased in CUX2-P454L, CUX2-W958R and E1283K (n=13 ~ 25) (D). Results of one-way ANOVA followed by Tukey's test. (E) TUNEL assay revealed no apoptosis in adult transgenic flies of CUX2-WT and mutants. Scale bars = 20  $\mu$ m (A) or 50  $\mu$ m (B, C, and E). \*  $P < 0.05$ , \*\*  $P < 0.01$ , \*\*\*  $P < 0.001$ .

### Figure S2. *Cux2*-deficient mice show seizure susceptibility to kainate but not to PTZ. (A)

Body weight was similar among genotypes of 2-month-old mice. (B-F) Unchanged seizure susceptibility of *Cux2*-KO mice to PTZ. There are no significant differences in latency to generalized convulsive seizure (GS) (B), latency to death (C), percentage of animals exhibiting GS (D), mortality rate (E), and seizure severity score (F) among genotypes. (G, H) *Cux2*-KO mice show increased seizure susceptibility to kainate. Latency to onset of GS (G) and that to death (H) were significantly decreased in *Cux2*(-/-) female and combined gender mice. One-way ANOVA (A-C, F-H) or Pearson's Chi-square test (3×2 contingency table) (D, E). mean

(horizontal bars)  $\pm$  s.e.m. (B, C, G, H). n or numbers in round brackets =mouse numbers. \*  $P < 0.05$ , \*\*  $P < 0.01$ .

**Figure S3. CUX2 antibody specifically recognizes CUX2 protein.** (A) Sagittal brain sections from 10-month-old adult WT mice were stained with an antibody to CUX2. Immunoreactions (arrows) were observed widely in the brain including in neurons at the hippocampus and cerebral cortex. A2-A5: magnified images outlined in A1. (B) CUX2 immunoreactions were not observed in *Cux2*(-/-) mouse. B2-B5: magnified images outlined in B1. (C) In 2-month-old wild-type mouse, CUX2 (brown) is densely expressed in excitatory neurons at neocortical (II–IV) and entorhinal cortex (II–III) upper layers, but in hippocampus observed in inhibitory but not excitatory neurons. (D) In hippocampus at P15, CUX2 (brown) is expressed in interneurons but not in excitatory neurons. Scalebars=500  $\mu$ m (A1 and B1), 100  $\mu$ m (C, D) or 20  $\mu$ m (A2-A5 and B2-B5). CTX; cerebral cortex, DG; dentate gyrus, so; stratum oriens, h; hilus.

**Figure S4. CUX2 is expressed in hippocampal SST-positive, RLN-positive or PV-positive inhibitory neurons.** Tissue sections from P15 (A–C) or 2-month-old (E–G) WT mouse brains were stained with antibodies to CUX2 (brown) and somatostatin (SST, blue) (A, E), reelin (RLN, blue) (B, F) or parvalbumin (PV, blue) (C, G). CUX2 expression was observed in SST-positive, PV-positive and RLN-positive (arrow) interneurons at both stages. Some of the intense CUX2-positive cells were SST-negative, RLN-negative or PV-negative (white arrow head), and some of the intense SST-positive or PV-positive cells were CUX2-negative (black arrow head). CUX2-positive / PV-positive cell number increased at 2-months compared to P15. A2-A4, B2-B4, C2-C4, E2-E4, F2-F4, G2-G4, A5 and B5: magnified images outlined in A1, B1, C1, E1, F1, G1, A4 and B4, respectively. (D, H) Tissue sections from at P15 (D) or 2-month-old (H) WT mouse brain were stained with antibodies to SST (green) or RLN (magenta) and DAPI (cyan). The SST

expression was observed in RLN-positive interneurons (arrows) at the hilus of hippocampus. SST/RLN-double positive cells were more frequent in P15 (D) than 2-month-old sections (H). RLN signals became weaker at 2-months (H) compared to P15 (D). Some of intense SST-positive cells were RLN-negative (arrow head), and some of intense RLN-positive cells were SST-negative (asterisk). Scale bar=100  $\mu$ m (A1, B1, C1, E1, F1, and G1) or 20  $\mu$ m (A2-A4, B2-B4, C2-C4, D, E2-E4, F2-F4, G2-G4 and H). h; hilus.

**Figure S5. Unchanged cell numbers of hippocampal inhibitory neurons, mossy fibers and cFos expression in *Cux2*-deficient mice.** (A) Hippocampus was separated in 7 regions and immunoreactive cells were counted. Cell densities were determined by average number of cells in 4 sections / area. (B-D) There were no differences in the number of SST-positive (B), RLN-positive (C) or PV-positive (D) neurons between genotypes. Statistical analyses were performed using one-way ANOVA ( $p > 0.05$ ) (n = WT: 6, *Cux2*(+/-): 6, *Cux2*(-/-): 6). so; stratum oriens, sp; stratum pyramidale, sr; stratum radiatum, lm; lacunosum-moleculare, sm; stratum moleculare, sg; stratum granulosum, h; hilus, w; whole hippocampus. (E, F) Timm staining (E) and c-Fos immunohistochemistry (F) did not show differences in *Cux2*-KO mice. Scale bar = 100  $\mu$ m (A and E).

**Figure S6. IPSCs in PV-positive cells at dentate gyrus were increased, but no differences in EPSCs in CA3 pyramidal cells of *Cux2*-deficient mice.** (A-D) In PV-positive cells at dentate gyrus, IPSCs were measured at 6~7-week-old. Amplitude histograms of sIPSC (A) and mIPSC (C) from WT mice and *Cux2*(-/-) mice. Cumulative probability plots and average values (inset) for sIPSC (B) and mIPSC (D) show significant differences in inter-event intervals of sIPSC and mIPSC and amplitude of mIPSC populations derived from *Cux2*(-/-) and significantly higher average of frequency of sIPSC, but unchanged averages of amplitude of sIPSC and both

frequency and amplitude of mIPSC in *Cux2*(-/-). (E-H) In pyramidal neurons at CA3 region, EPSCs were measured at 6~7-week-old. Amplitude histograms of sEPSC (E) and mEPSC (G) from WT, *Cux2*(+/-) and *Cux2*(-/-) mice. Cumulative probability plots and average values (inset) for sEPSC (F) and mEPSC (H) in WT, *Cux2*(+/-) and *Cux2*(-/-) show no differences in EPSCs among genotypes. (I) No significant difference on MF-evoked EPSCs in pyramidal neurons at CA3 region was observed across genotypes at 6~7-week-old. Statistical analyses were performed using one-way ANOVA followed by Tukey–Kramer Multiple Comparison Test (B, D, F, H, I) or Kolmogorov-Smirnov (K-S) Test (B, D). \*  $P < 0.05$ , \*\*\*  $P < 0.001$ .

**Figure S7. Genome structures of human and mouse *CUX1* and *CASP* in WT and *Casp*-specific knock-out mice.** Exons 1~14 are commonly found in human *CUX1* and *CASP* in human (A) and in the corresponding genes in mice (B). In *Casp*-KO mice, a mutation (c.1514^1515insTT, p.S506fs) was inserted in *Casp*-specific exon 17 (C). The diagrams were reconstructed from that of UCSC Genome Browser. Vertical lines indicate exons.

**Figure S8. *CUX1* is expressed in hippocampal SST-positive, RLN-positive, or PV-positive interneurons.** *CUX1* (brown) is expressed in SST-positive (A), RLN-positive (B) and PV-positive (C) interneurons (arrows). Some of intense *CUX1*-positive cells were SST-negative, RLN-negative or PV-negative (white arrowheads), and some of SST-positive, RLN-positive or PV-positive cells were *CUX1*-negative (black arrowhead and not shown). Most of *CUX1*-positive cells were PV-negative (white arrowhead) in hilus (C). A2-A4, B2-B4, C2-C4: magnified images outlined in A1, B1, C1, respectively. Scale bars = 100  $\mu$ m (A1, B1 and C1) or



20  $\mu$ m (A2-A4, B2-B4 and C2-C4). sp; stratum pyramidale, so; stratum oriens, sg; stratum granulosum, h; hilus.

**Figure S9. CASP, CUX1 and CUX2 expression and increased seizure susceptibility to kainate with a tendency of increase in excitatory cell number in entorhinal cortex of *Casp*-deficient mice.** (A) CASP immunosignals were observed in both excitatory and inhibitory neurons in the hippocampus, though the signals in inhibitory neurons were especially intense such as those at hilus (A3) and stratum oriens of CA3 (A5), while signals in excitatory neurons are tiny such as those at stratum granulosum (A4) or pyramidal of CA3 (A6). CASP signals well disappeared in *Casp*(-/-) mice (A7, A8). Nuclei were stained with hematoxylin (blue). (B, C) Unaltered expression and subcellular localization of CUX1 and CUX2 in cerebral cortex (B) and hilus of hippocampus (C) of *Casp*-KO mice. (D) Body weights were similar among *Casp*-KO mice and WT littermates at 2-months. (E) qPCR experiments showed that mRNA expression levels of kainate receptor subunits were not altered in *Casp*-KO mice at 2-month-old. (F) In a Nissl staining, number of entorhinal cortex layer II-III neurons was comparable between WT and *Casp*(-/-) mice (2-month-old). (G) Seizure severity scores were significantly higher in *Casp*(-/-) male and combined gender mice. (H) Latencies to onset of generalized seizures (GS) were significantly decreased in male and combined gender of *Casp*(-/-) mice. (I) Latencies until death were also significantly decreased in combined gender of *Casp*(-/-) mice. Mice without GS or death within 3,600 sec were plotted at "no GS" or "no death", respectively. Circles represent individual mice. One-way ANOVA followed by Tukey–Kramer Multiple Comparison Test (D,

E, G-I), or one-way ANOVA test (F). mean (horizontal bars)  $\pm$  s.e.m. (H, I). n=mouse number.

Scale bars= 50  $\mu$ m (A1, A2, A7, A8, B and C) or 10  $\mu$ m (A3-A6). \*  $P < 0.05$ , \*\*  $P < 0.01$ .

**Figure S10. CASP interacts with CUX2.** mRFP-tagged CUX2 was co-immunoprecipitated with FLAG-tagged CASP. Mutations did not affect the binding. Endophilin: negative control.

**Table 1: *CUX2*, *CUX1*, and *CASP* gene nonsynonymous variants in patients with epilepsy.**

| Patient ID | Gene        | Nucleotide changes | Amino acid substitutions | SNP ID      | Onset age (year) | Sex | Diagnosis      | Variant allele count in |         |             |              |               |                  |                   | Mutation Taster | PolyPhen-2 | PROVEAN | SIFT |
|------------|-------------|--------------------|--------------------------|-------------|------------------|-----|----------------|-------------------------|---------|-------------|--------------|---------------|------------------|-------------------|-----------------|------------|---------|------|
|            |             |                    |                          |             |                  |     |                | case                    | JP      | J-HGVD      | EVS          | 1kGP          | ExAC             | gnomAD            |                 |            |         |      |
| SIZ-220    | <i>CUX2</i> | c.100C>T           | p.R34W                   | rs199531850 | 10               | M   | mTLE           | 1 / 542                 | 0 / 622 | 1 / 1,900   | 1 / 11,778   | 1 / 5,008     | 21 / 119,874     | 62 / 273,306      | ++              | -          | ++      | ++   |
| SIZ-016    |             | c.1009G>A          | p.D337N                  | rs201601231 | 16               | M   | mTLE           | 1 / 542                 | 5 / 622 | 4 / 2,192   | 1 / 12,344   | 2 / 5,008     | 18 / 117,772     | 34 / 279,160      | ++              | ++         | -       | -    |
| SIZ-296    |             | c.1361C>T          | p.P454L                  | rs768144991 | 2                | M   | Doose syndrome | 1 / 542                 | 0 / 622 | 5 / 2,184   | NR           | NR            | 1 / 24,448       | 8 / 167,304       | ++              | +          | ++      | -    |
| SIZ-014    |             | c.2872T>C          | p.W958R                  | NA          | 3                | M   | mTLE           | 1 / 542                 | 0 / 622 | NR          | NR           | NR            | NR               | NR                | ++              | ++         | ++      | ++   |
| SIZ-004    |             | c.3847G>A          | p.E1283K                 | rs61745424  | 11               | F   | mTLE           | 5 / 542                 | 2 / 622 | 9 / 2,126   | 227 / 12,676 | 143 / 5,008   | 3,893 / 120,384  | 8,188 / 280,456   | -               | -          | -       | -    |
| SIZ-022    |             |                    |                          |             | 8                | F   | mTLE           |                         |         |             |              |               |                  |                   |                 |            |         |      |
| SIZ-073    |             |                    |                          |             | 19               | M   | mTLE           |                         |         |             |              |               |                  |                   |                 |            |         |      |
| SIZ-079    |             |                    |                          |             | 13               | M   | ITLE           |                         |         |             |              |               |                  |                   |                 |            |         |      |
| SIZ-190    |             |                    |                          |             | 16               | F   | mTLE           |                         |         |             |              |               |                  |                   |                 |            |         |      |
| SIZ-784    | <i>CUX1</i> | c.3161C>T          | p.S1054L                 | rs146486358 | 16               | M   | JME suspected  | 2 / 542                 | NT      | 9 / 1,912   | NR           | 13 / 5,008    | 101 / 120,970    | 231 / 282,774     | ++              | ++         | -       | -    |
| SIZ-891    |             | c.3281C>T          | p.A1094V                 | rs184337744 | NA               | M   | GEFS           | 1 / 542                 | NT      | NR          | 1 / 13,006   | 1 / 5,008     | 38 / 120,936     | 38 / 250,814      | -               | +          | -       | -    |
| SIZ-575    |             | c.3815G>A          | p.R1272Q                 | NA          | 3                | F   | FLE            | 1 / 542                 | NT      | NR          | 1 / 13,006   | 1 / 5,008     | 38 / 120,936     | 38 / 250,814      | -               | +          | -       | -    |
| SIZ-669    |             | c.3815G>A          | p.R1272Q                 | NA          | 0                | F   | SGE            | 1 / 542                 | NT      | 2 / 2,152   | NR           | NR            | NR               | NR                | ++              | ++         | -       | ++   |
| SIZ-456    |             | c.4172C>T          | p.T1391I                 | NA          | 2                | F   | CAE            | 1 / 542                 | 0 / 620 | NR          | NR           | NR            | NR               | NR                | -               | -          | -       | -    |
| SIZ-127    | <i>CASP</i> | c.1390G>A          | p.A464T                  | rs803064    |                  |     |                | 247 / 542               | NT      | 991 / 2,210 | NR           | 2,800 / 5,008 | 68,923 / 121,236 | 159,104 / 282,310 | -               | -          | -       | -    |
|            |             | c.1433C>T          | p.A478V                  | NA          | 14               | F   | JME            | 1 / 542                 | 0 / 622 | NR          | NR           | NR            | NR               | NR                | ++              | +          | -       | -    |
|            |             | c.1524delG         | p.R509fs                 | rs782400087 | 6                | F   | CAE            | 1 / 542                 | 0 / 622 | NR          | NR           | NR            | 1 / 121,412      | 1 / 249,562       | ++              | NA         | NA      | NA   |
|            |             | c.1687G>A          | p.G563S                  | rs187131238 | 12               | F   | JME            | 2 / 542                 | 1 / 622 | 3 / 2,164   | NR           | 2 / 5,008     | 4 / 120,438      | 7 / 247,922       | -               | -          | -       | -    |
|            |             | c.1687G>A          | p.G563S                  | rs187131238 | 18               | M   | mTLE           | 2 / 542                 | 1 / 622 | 3 / 2,164   | NR           | 2 / 5,008     | 4 / 120,438      | 7 / 247,922       | -               | -          | -       | -    |
|            |             | c.1868_1870delTCT  | p.F623del                | NA          | 15               | M   | ITLE           | 1 / 542                 | 0 / 622 | NR          | NR           | NR            | NR               | NR                | ++              | NA         | ++      | NA   |

mTLE; mesial temporal lobe epilepsy, ITLE; lateral temporal lobe epilepsy, JME; juvenile myoclonic epilepsy, CAE; childhood absence epilepsy, SGE; symptomatic generalized epilepsy, FLE; frontal lobe epilepsy, GEFS; generalized epilepsy with febrile seizure plus, M; Male, F; Female. JP; in-house Japanese control individuals, J-HGVD; Japanese Human Genetic Variation Database, EVS; Exome Variant Server NHLBI GO Exome Sequencing Project, 1kGP; The 1000 Genomes Project, ExAC; Exome Aggregation Consortium, gnomAD; Genome Aggregation Database. ++; Disease causing, Probably damaging, Deleterious, or Damaging, +; Possibly damaging, -; Polymorphism, Benign, Tolerated, or Neutral, NA; not available, NT; not tested, NR; not registered. The *CUX2* reference sequence (NM\_015267) has an error at c.4414, and the correct nucleotide is C. *CUX2* nucleotide change c.4414G>C (p.V1472L) (rs6490073 in dbSNP, NCBI) was observed in all sequences in databases and in our subjects, suggesting that the *CUX2* reference sequence (NM\_015267) has an error at this position (the correct nucleotide is c.4414C).

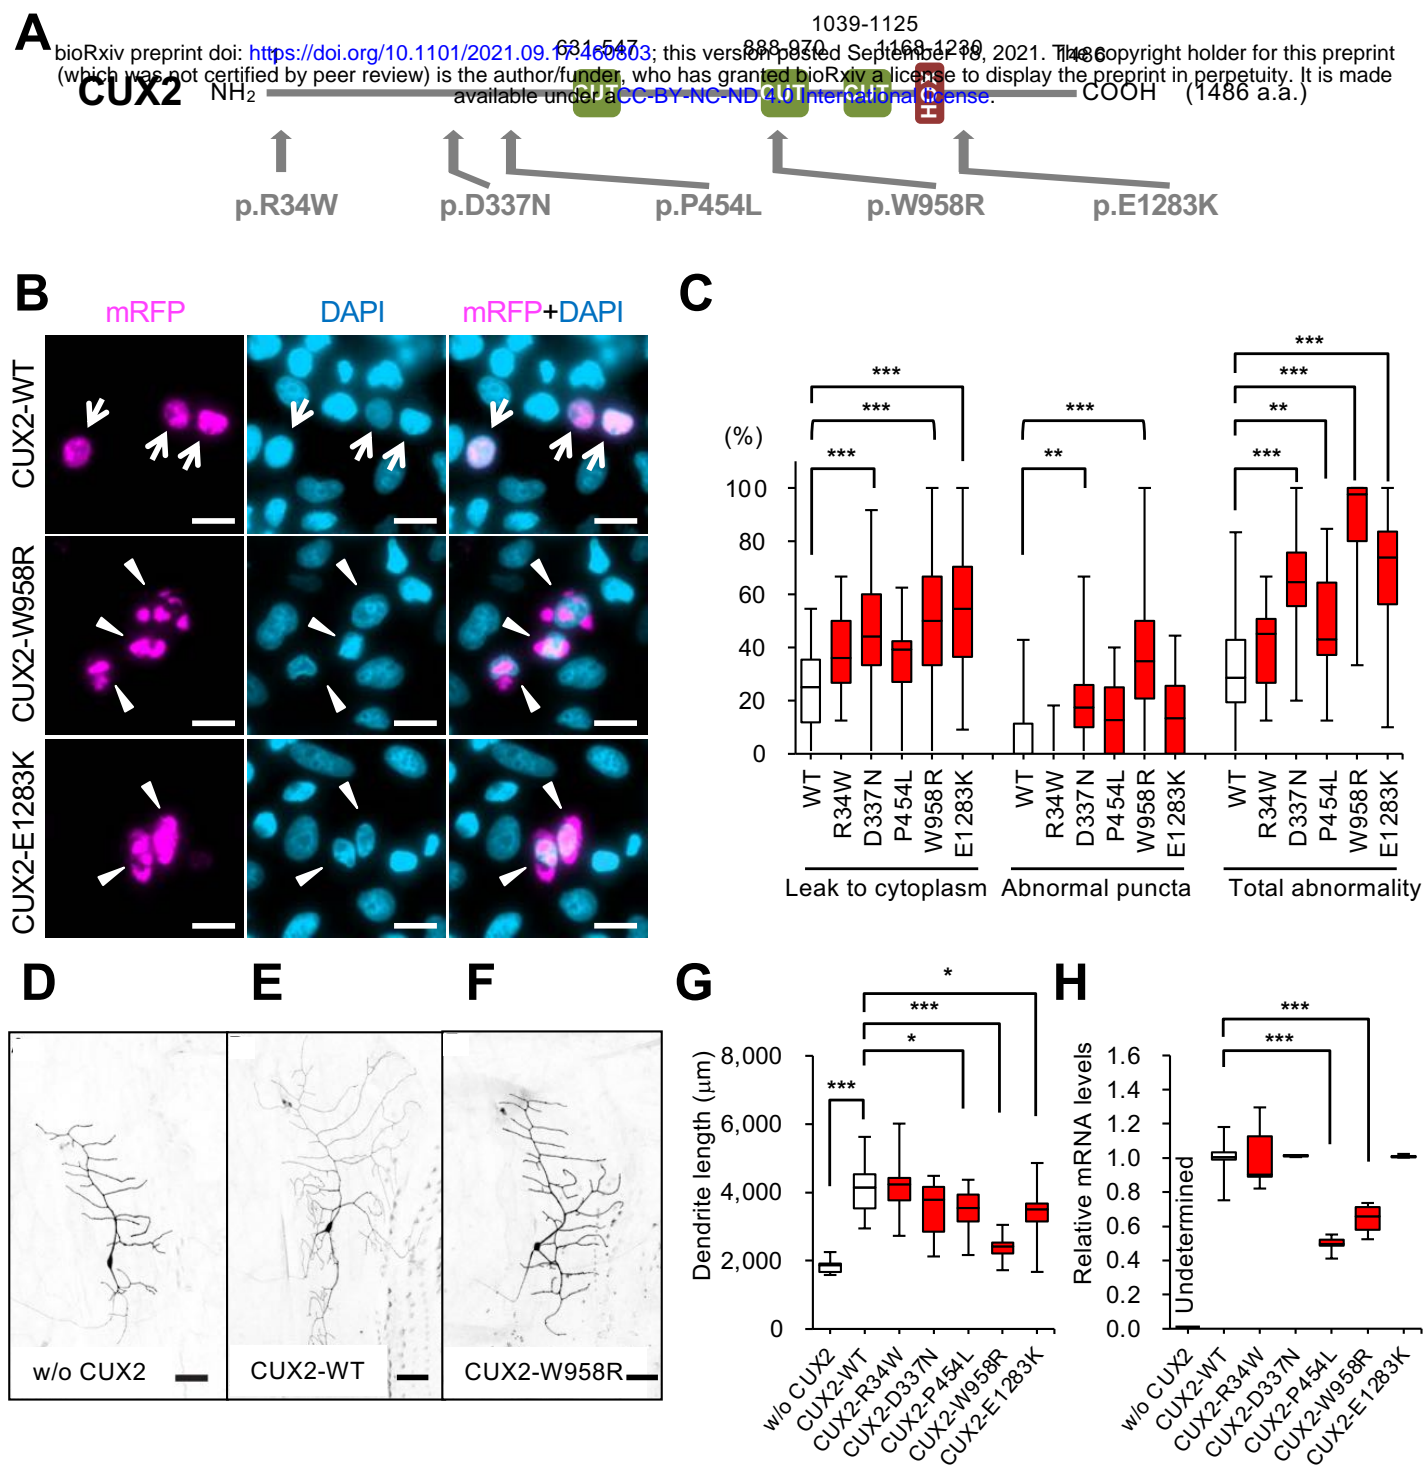

**Figure 1**

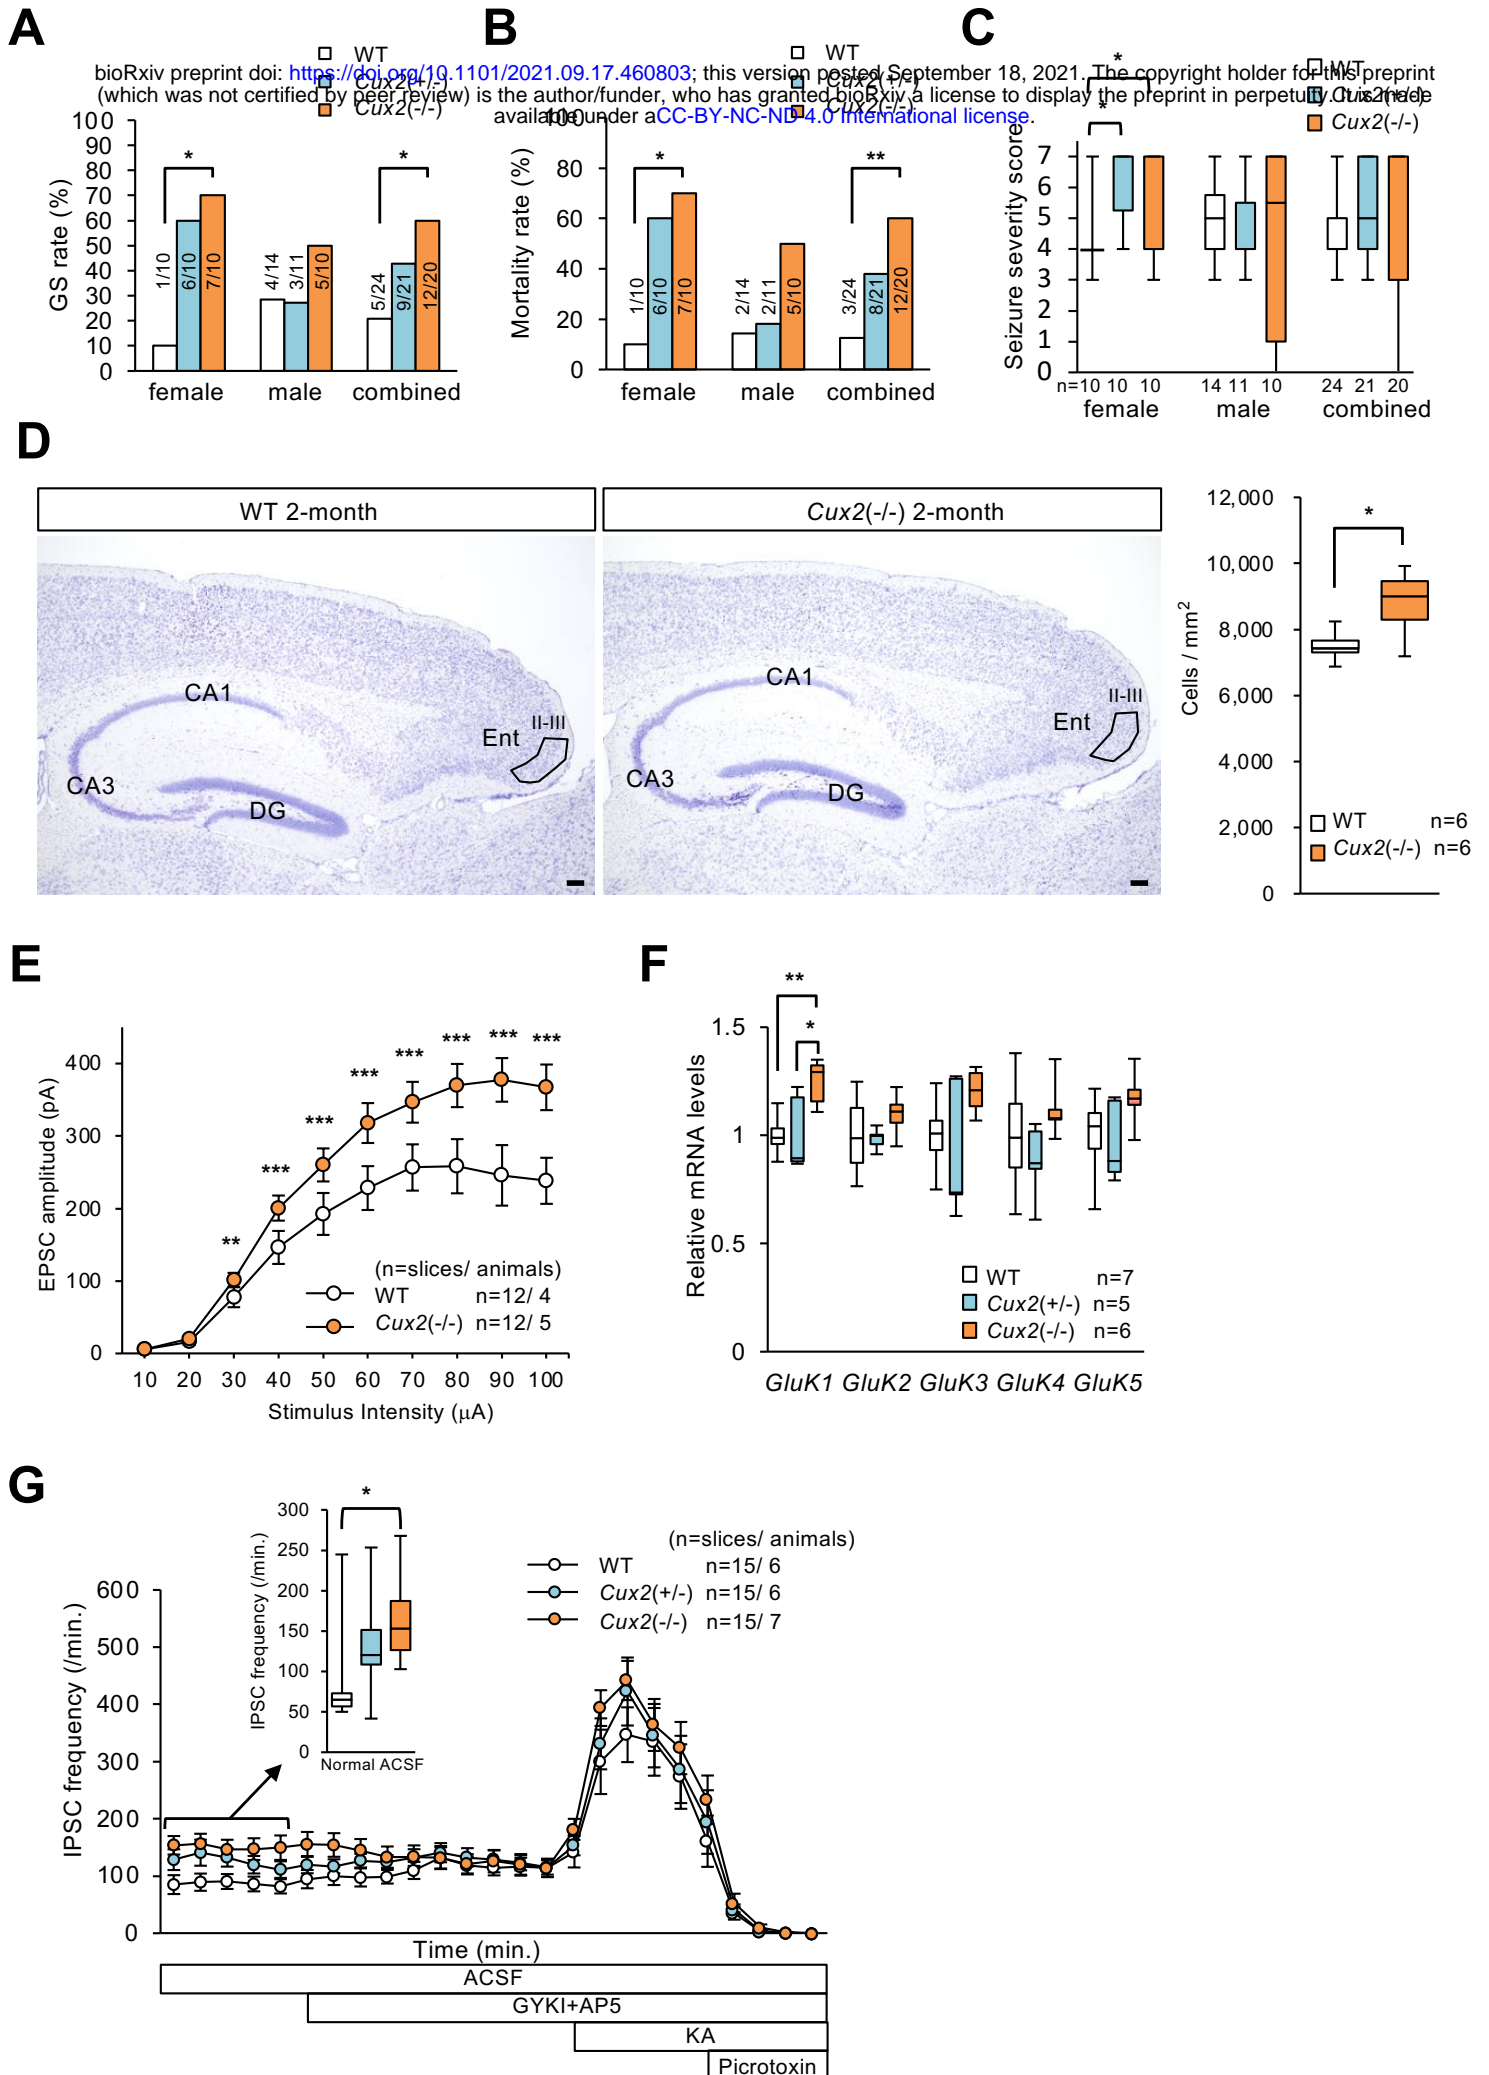

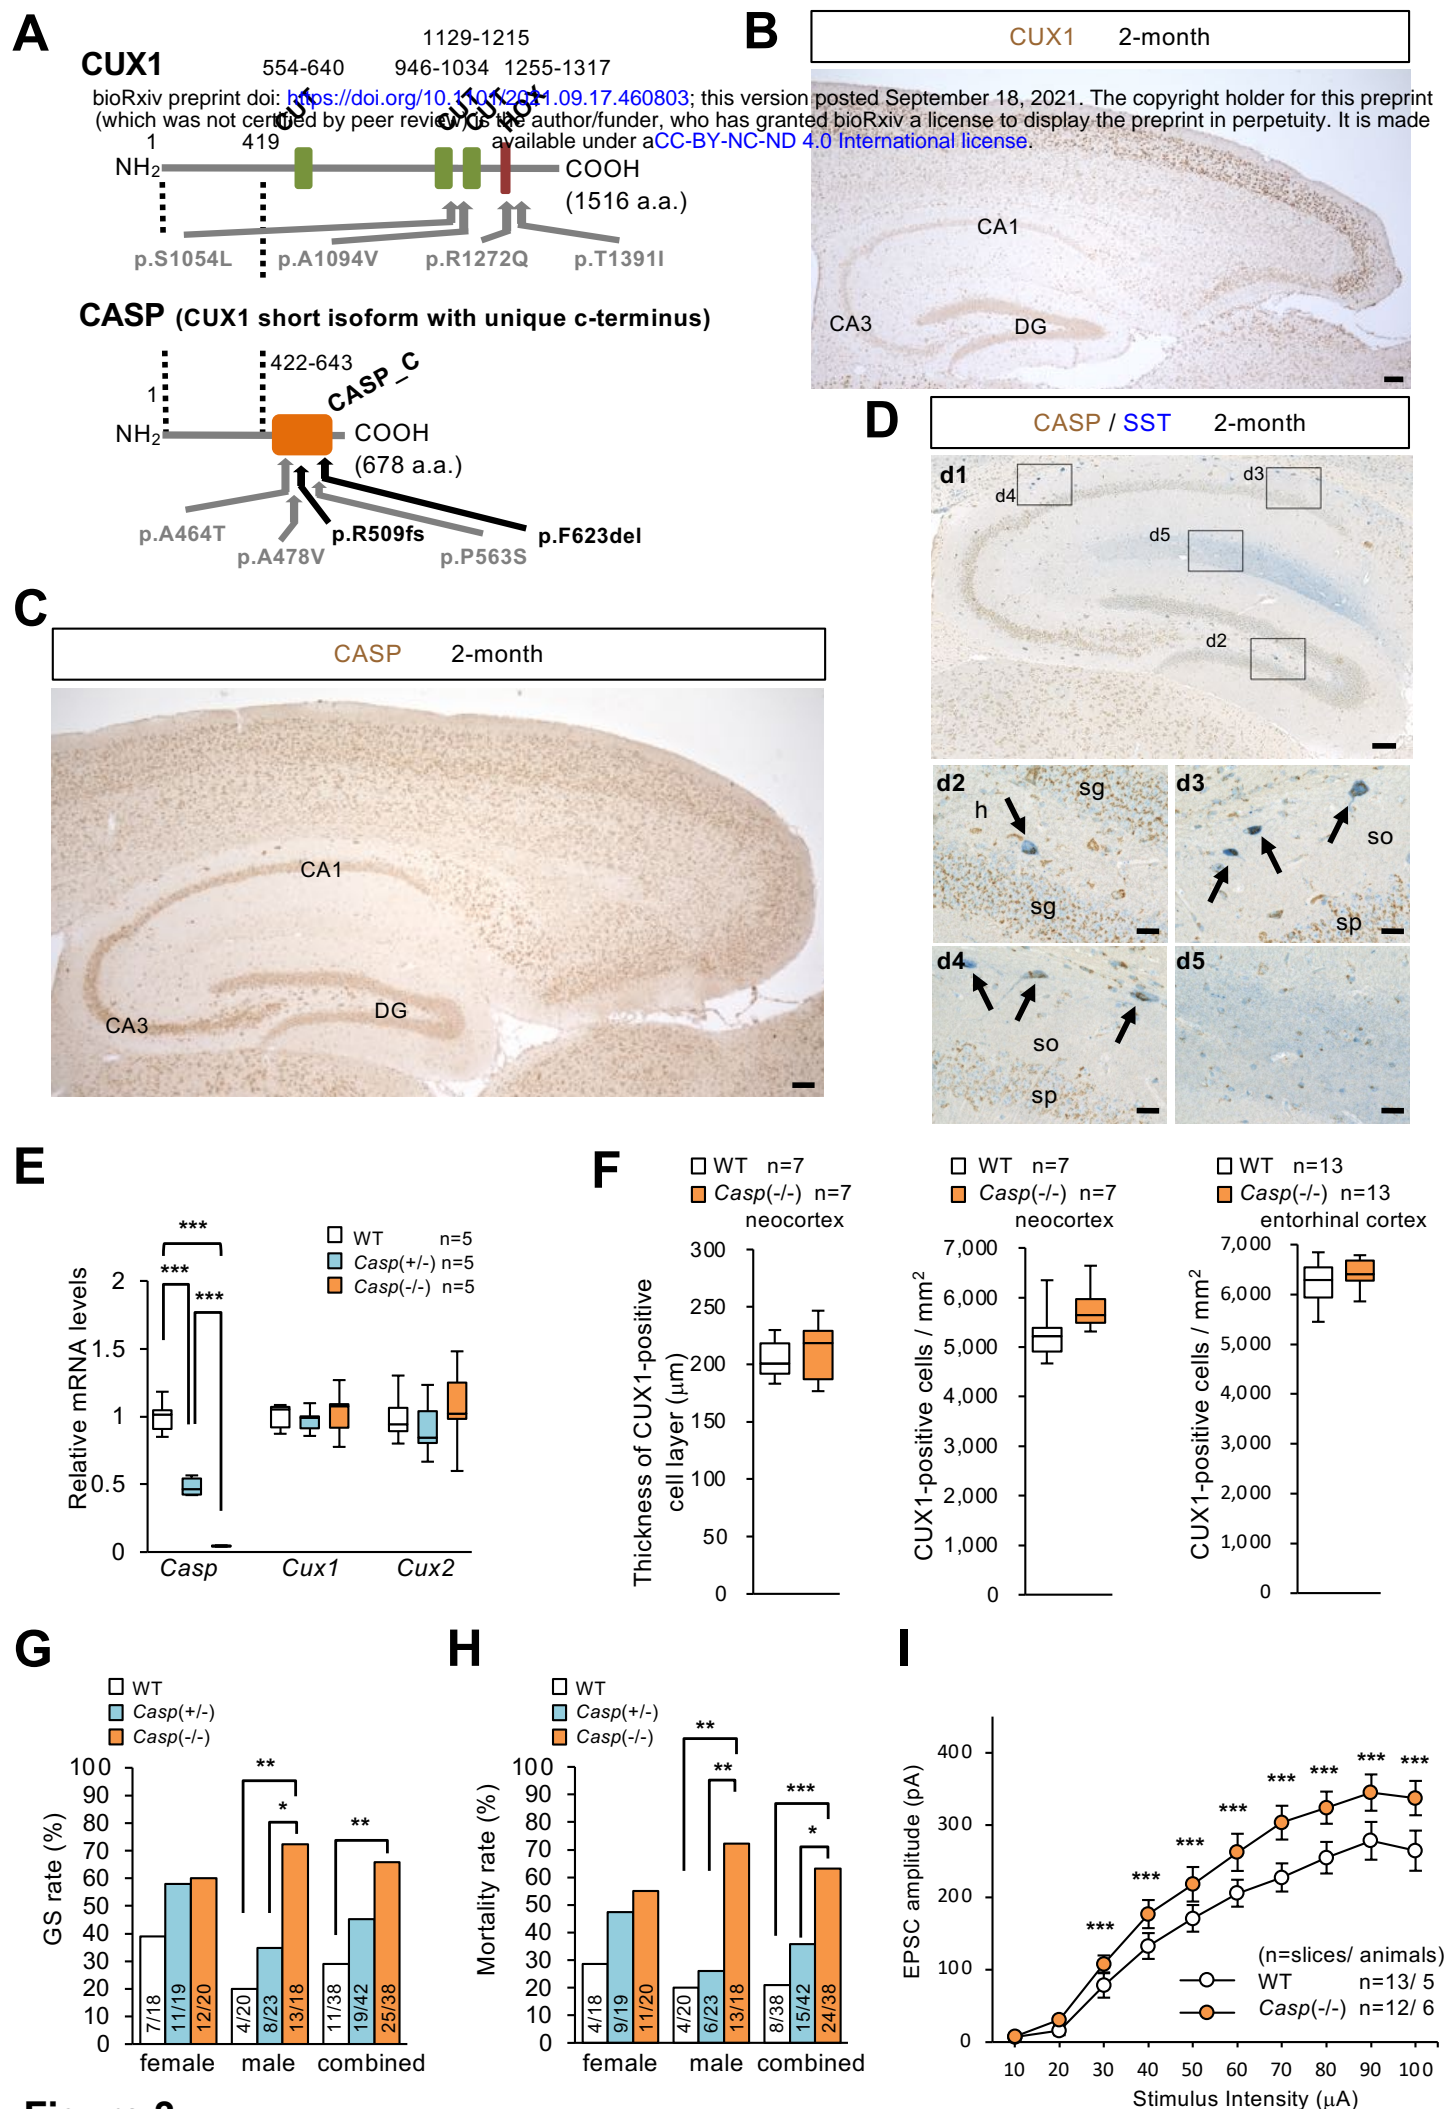

**Figure 3**
